# Supplementary material for: Updated climatological mean Δ f CO 2 and net sea–air CO 2 flux over the global open ocean regions
Source: Copernicus journal article supplement (doi:10.5194/essd-16-2123-2024), 2024-05-02
Supplement: Supplementary file 1 [file essd-16-2123-2024-supplement.pdf]

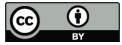

*Supplement of*

## **Updated climatological mean $\Delta f\text{CO}_2$ and net sea–air $\text{CO}_2$ flux over the global open ocean regions**

**Amanda R. Fay et al.**

*Correspondence to:* Amanda R. Fay ([afay@ldeo.columbia.edu](mailto:afay@ldeo.columbia.edu))

The copyright of individual parts of the supplement might differ from the article licence.

1 Supplementary Figures

2  
3

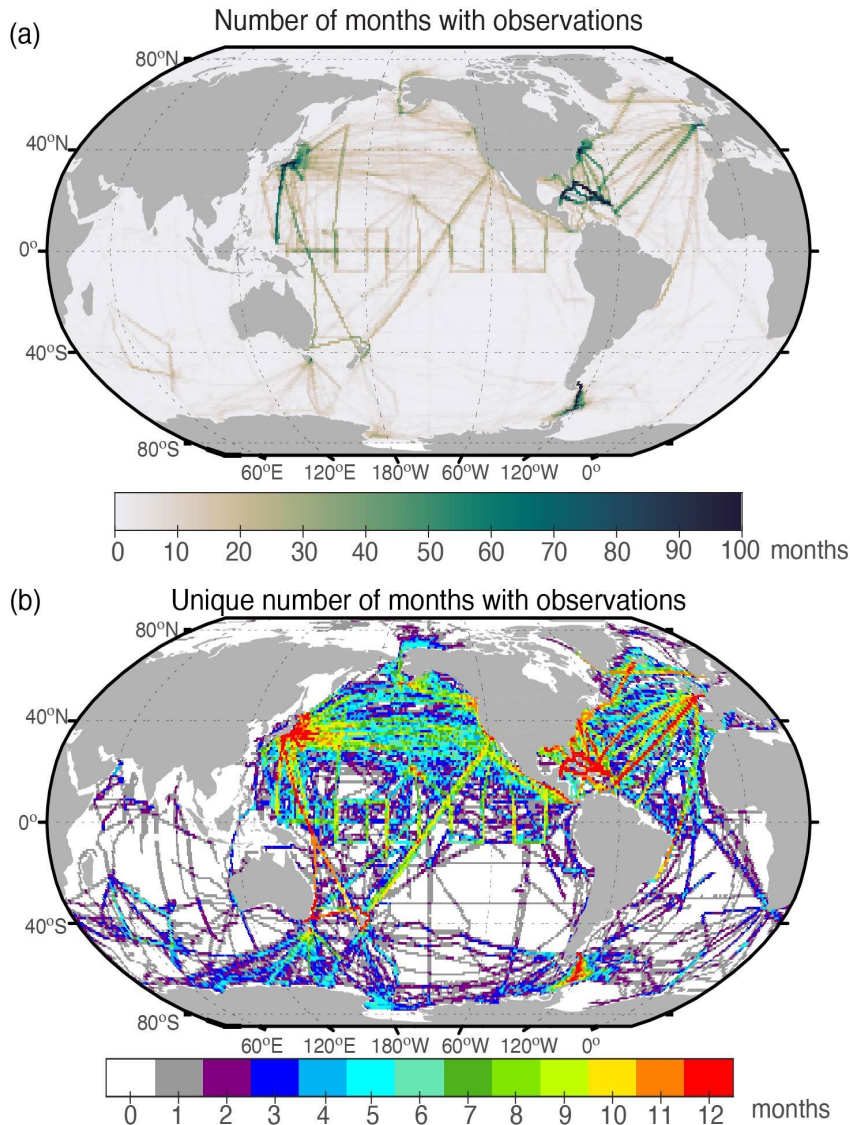

4  
5 Figure S1: (a) Total number of months with at least one observation in each 1° grid cell  
6 in the LDEOV2019 database, for years 1980-2019. The maximum number possible for a  
7 grid cell is 480 (40 years \* 12 months). (b) the number of unique calendar months in  
8 each grid cell where at least one observation has been made since 1980. Red indicates  
9 grid cells where each month (Jan - Dec) has been sampled at least once over the 40  
10 year time series while white indicates grid cells with no measurements over the length  
11 of the time series.

12  
13

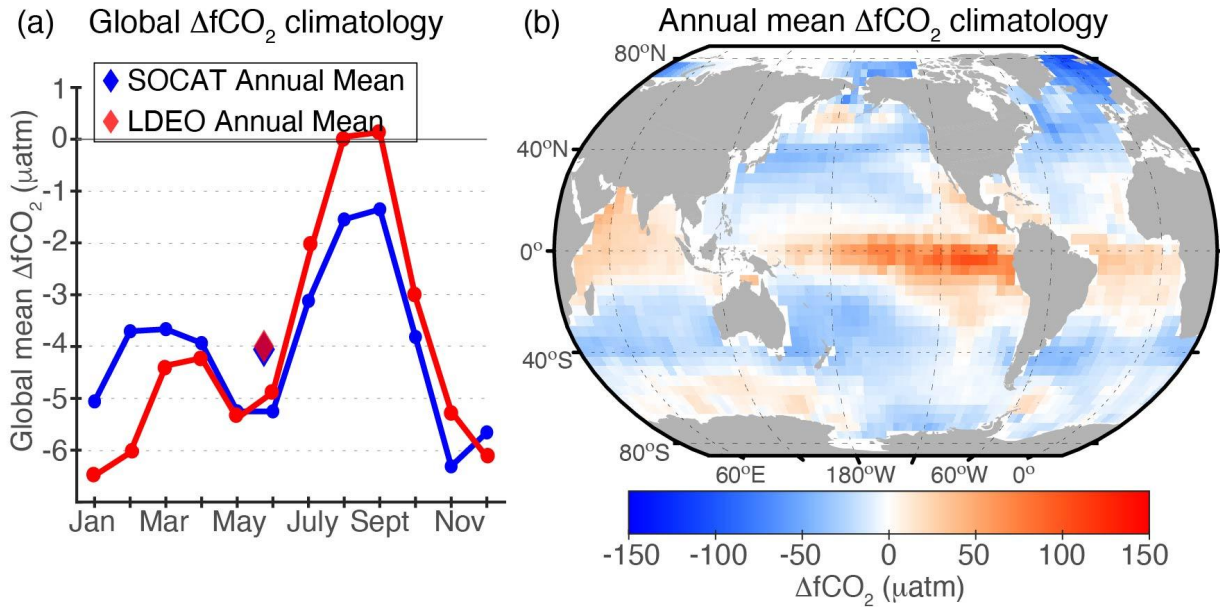

14  
 15 Figure S2: (a) Global mean delta fCO<sub>2</sub> seasonal climatology from the SOCATv2022  
 16 (blue) and LDEOv2019 (red) databases; annual mean values are indicated by the  
 17 diamond (SOCATv2022 = -4.1  $\mu\text{atm}$  and LDEOv2019 = -3.9  $\mu\text{atm}$ ). (b) Map of annual  
 18  $\Delta f\text{CO}_2$  climatology using LDEOv2019 database.

19  
 20  
 21  
 22

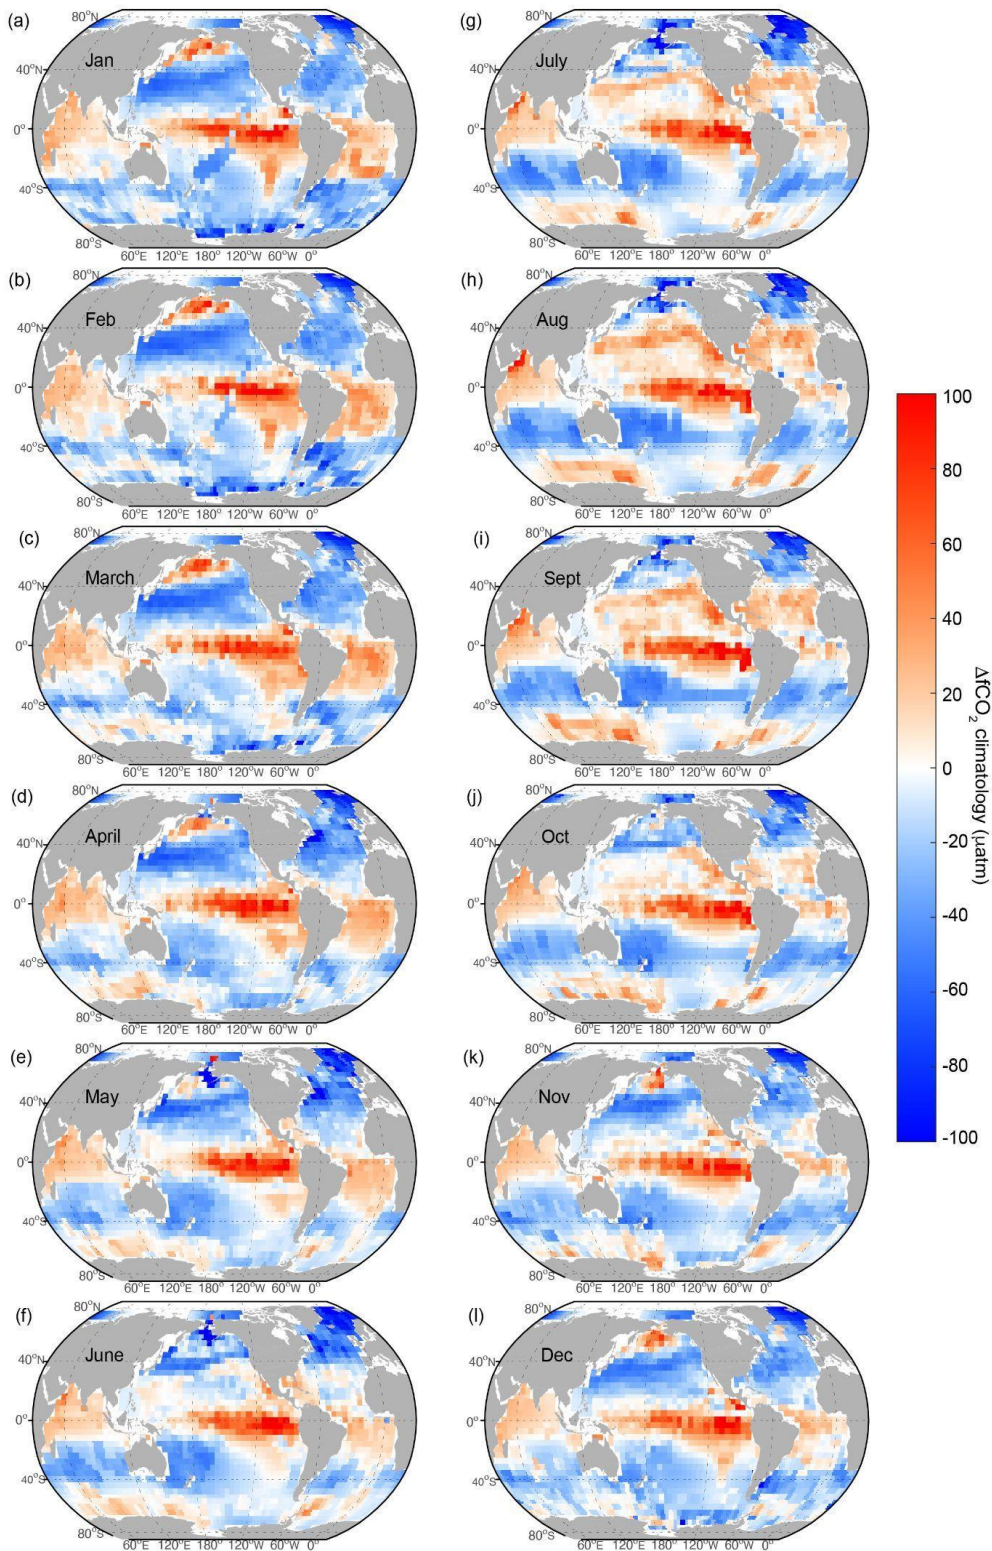

23  
 24 Figure S3. Monthly mean values for sea–air  $\Delta f\text{CO}_2$  obtained using the LDEO database.  
 25 Warm colors indicate positive  $\Delta f\text{CO}_2$  (ocean is greater than atmospheric  $\text{CO}_2$ ), white  
 26 indicates near zero  $\Delta f\text{CO}_2$ , and cool colors indicate negative  $\Delta f\text{CO}_2$  (ocean  $\text{CO}_2$  is lower  
 27 than the atmosphere).

28  
29  
30

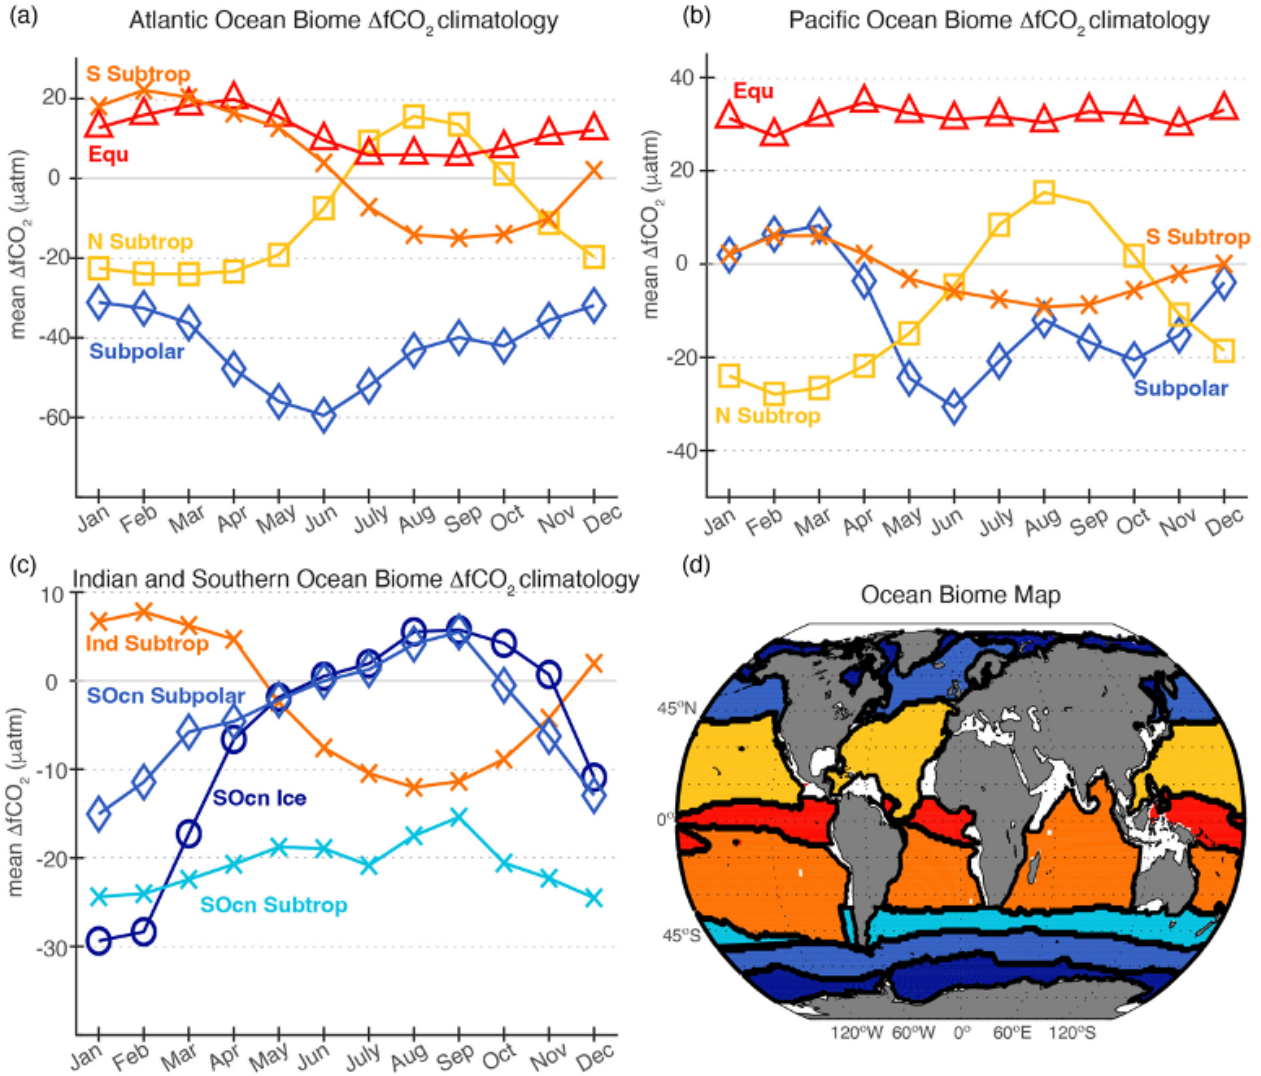

31  
32 Figure S4: Monthly climatology (produced using the LDEO database) of  $\Delta fCO_2$  for each  
33 regional ocean biome in the (a) Atlantic, (b) Pacific, (c) Indian and Southern Ocean  
34 basins. (d) Map of regional biomes. Colors of curves correspond to regions on the map  
35 in (d) with labels in matching colored text. Note that the y-axis varies between subplots.  
36

| <b>Biome</b> | <b>DJF</b> | <b>MAM</b> | <b>JJA</b> | <b>SON</b> |
|--------------|------------|------------|------------|------------|
| NP ICE       | None (1)   | -18.27 (3) | 0.64 (20)  | 1.65 (20)  |
| NP SPSS      | 2.1 (29)   | 0.99 (36)  | 0.94 (38)  | 1.76 (33)  |
| NP STSS      | 1.62 (41)  | 1.38 (37)  | 1.78 (35)  | 2.05 (34)  |
| NP STPS      | 1.49 (41)  | 1.45 (38)  | 2.14 (38)  | 1.94 (36)  |
| W Pac Equ    | 1.36 (41)  | 1.38 (34)  | 1.64 (35)  | 1.75 (36)  |
| E Pac Equ    | 2.57 (38)  | 1.97 (37)  | 2.04 (34)  | 2.36 (34)  |
| SP STPS      | 1.06 (36)  | 0.54 (36)  | 0.45 (35)  | 0.41 (35)  |
| NA ICE       | 1.38 (12)  | 0.42 (17)  | 1.92 (19)  | 1.82 (20)  |
| NA SPSS      | 2.02 (27)  | 1.5 (32)   | 1.58 (32)  | 1.28 (31)  |
| NA STSS      | 1.83 (29)  | 1.71 (30)  | 2.08 (31)  | 1.91 (34)  |
| NA STPS      | 1.57 (30)  | 1.59 (28)  | 2.04 (28)  | 1.78 (34)  |
| Atl Equ      | 1.37 (18)  | 1.49 (23)  | 1.41 (17)  | 1.71 (26)  |
| SA STPS      | 1.69 (24)  | 1.88 (20)  | 1.64 (15)  | 1.58 (27)  |
| IND          | 1.49 (29)  | 1.89 (17)  | 2.23 (17)  | 1.64 (14)  |
| SO STSS      | 1.82 (34)  | 1.69 (32)  | 1.37 (32)  | 1.13 (33)  |
| SO SPSS      | 1.67 (34)  | 1.77 (32)  | 1.88 (29)  | 1.71 (32)  |
| SO ICE       | 0.87 (33)  | 1.00 (28)  | 1.77 (25)  | 2.64 (29)  |

38

39 Table S1: Seasonal trends ( $\mu\text{atm/yr}$ ) for biome-mean  $f\text{CO}_2$  values- rows representing  
40 the 17 biomes as described in Fay & McKinley et al. 2014 and columns representing  
41 seasons (DJF: December, January, February; MAM: March, April, May, etc). Value in  
42 parentheses in each cell indicates the number of years with a biome mean value  
43 available in that season (max would be 42 as there are 42 years included in our  
44 analysis of 1980-2021).

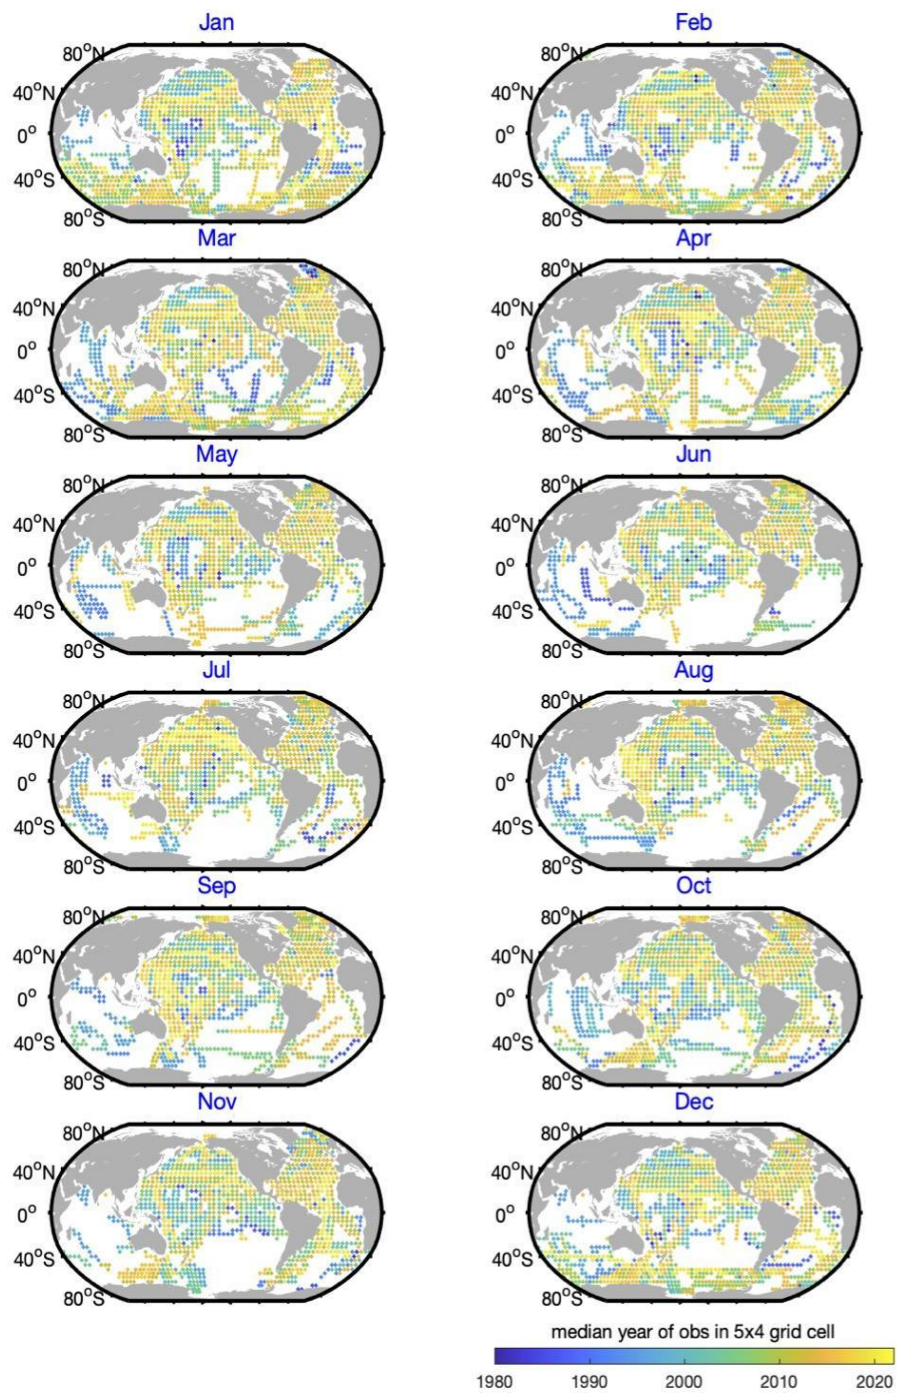

45  
 46 Figure S5: Median year of all observations feeding into this climatology, mapped for  
 47 each month.

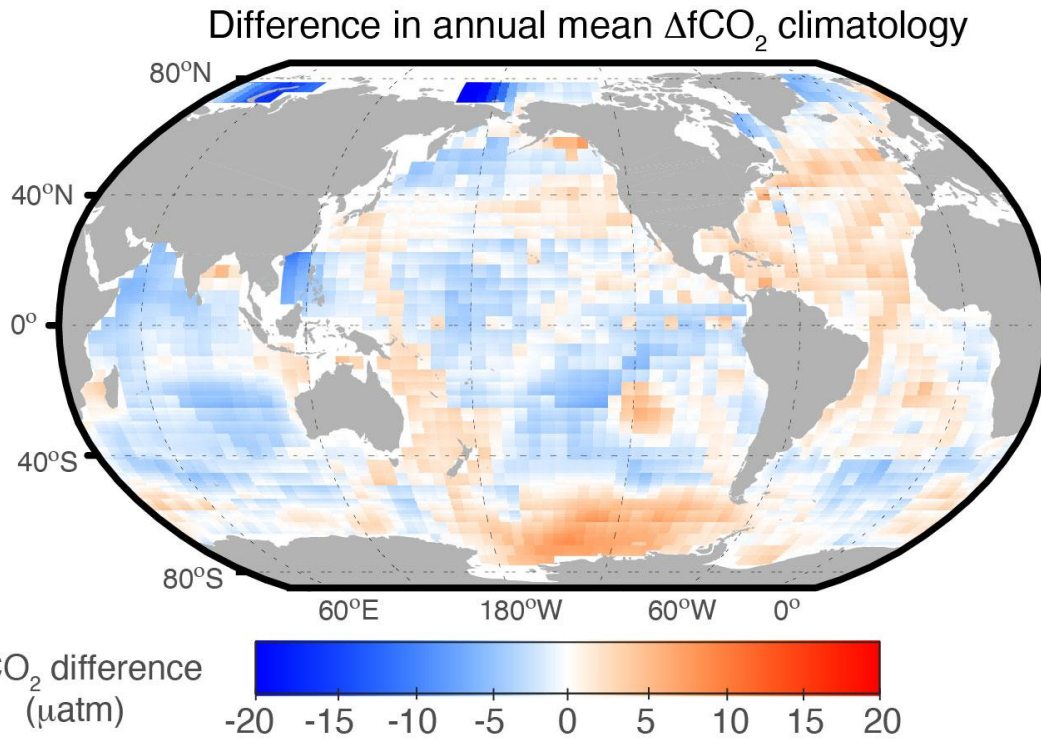

48  
49  
50  
51  
52

Figure S6: Annual mean difference in  $\Delta f\text{CO}_2$  calculated from the SOCAT database using a constant  $1.5\mu\text{atm yr}^{-1}$  time normalization minus the current  $\Delta f\text{CO}_2$  method.



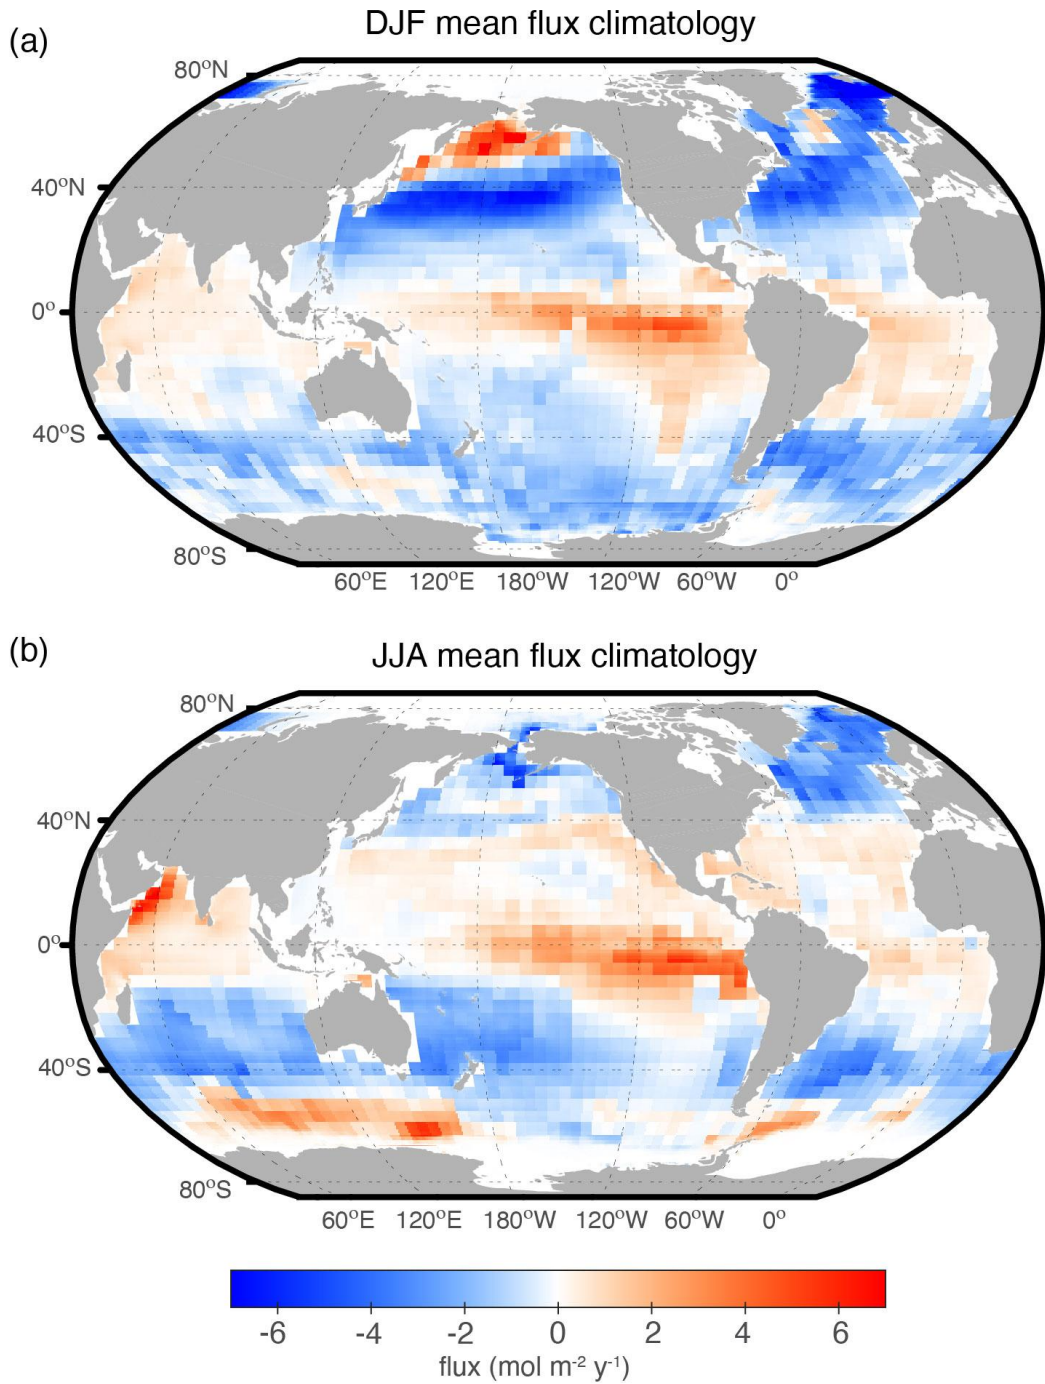

53  
 54 Figure S7: Seasonal sea–air CO<sub>2</sub> flux (mol C m<sup>-2</sup> year<sup>-1</sup>) climatology for (a) December,  
 55 January, February (DJF) and (b) June, July, August (JJA) using the LDEO database.  
 56 Positive values (warm colors) indicate sea-to-air fluxes (ocean efflux), and negative  
 57 values (cool colors) indicate air-to-sea fluxes (ocean uptake).  
 58

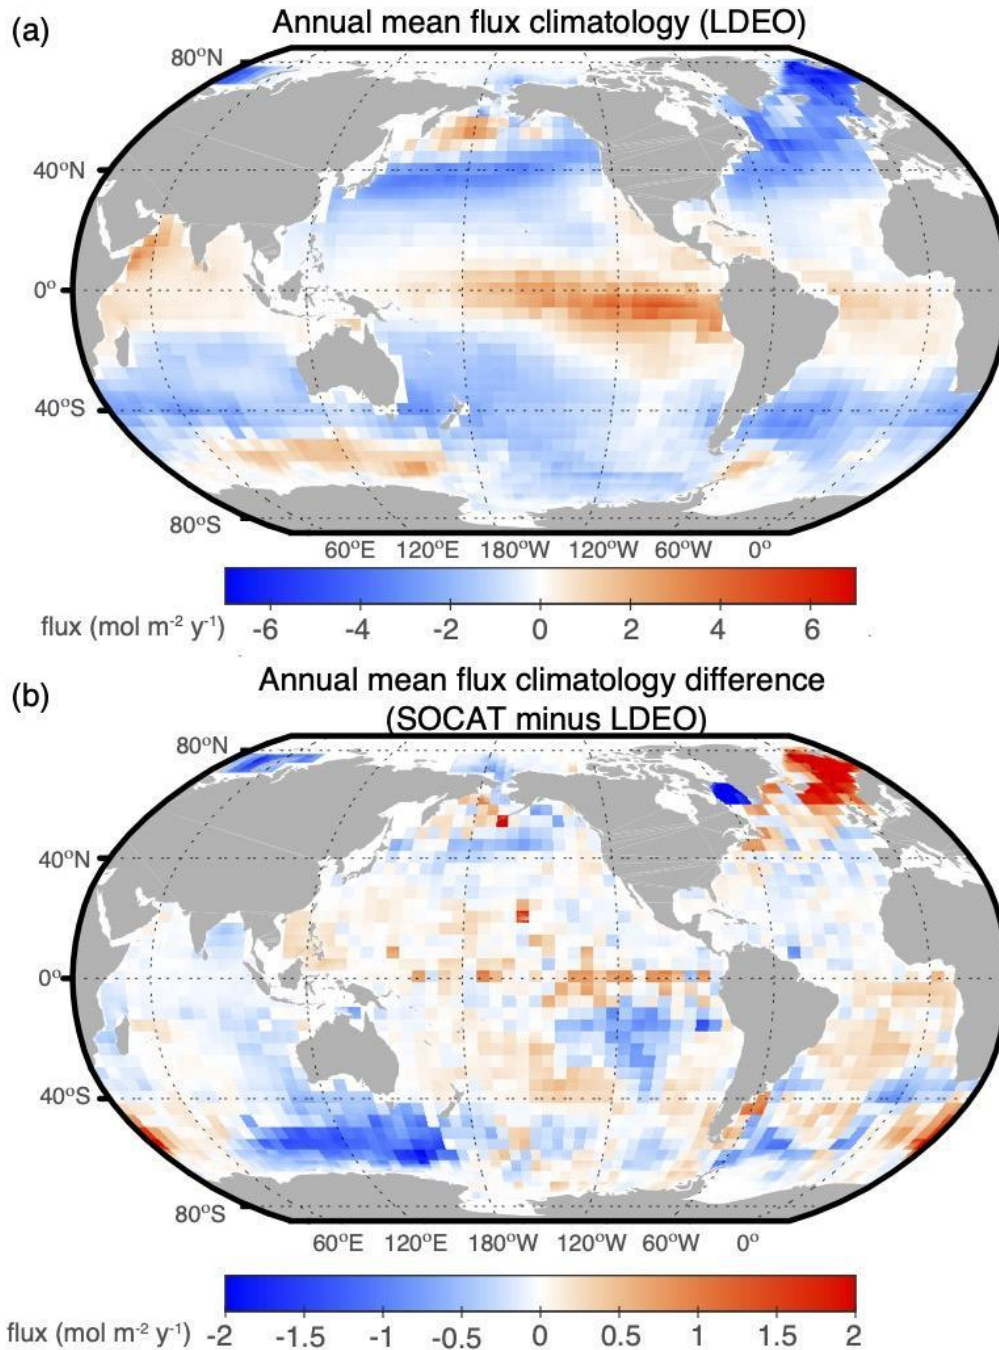

59  
 60 Figure S8: (a) Annual mean CO<sub>2</sub> flux calculated from the LDEO database and (b)  
 61 difference in flux between the SOCAT and LDEO database climatologies (SOCAT  
 62 *minus* LDEO). Flux is calculated identically for each climatology, using the SeaFlux  
 63 method using the mean of three wind speed reanalysis products. Warm colors indicate  
 64 regions of carbon efflux and cool colors indicate regions of carbon uptake. The global  
 65 mean flux is -1.79 PgC yr<sup>-1</sup> for SOCAT and -1.68 PgC yr<sup>-1</sup> for LDEO.  
 66  
 67

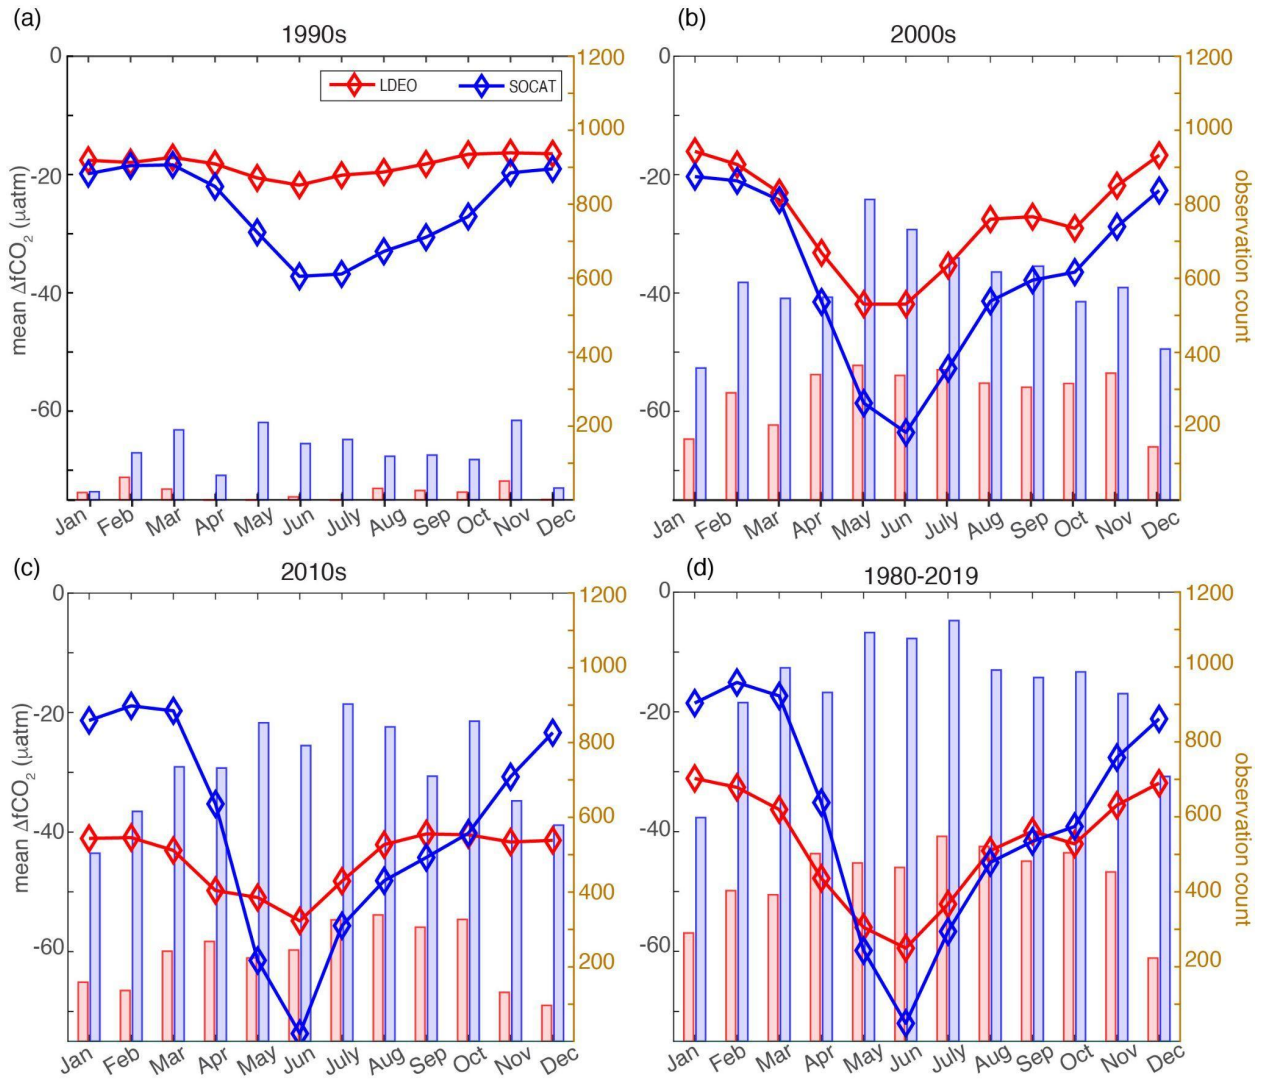

68  
 69 Figure S9: Monthly mean values for sea-air  $\Delta f\text{CO}_2$  differences in the North Atlantic  
 70 Subpolar biome. Average values for each month are plotted for the LDEO database  
 71 (red) and the SOCAT database (blue) for each decade: (a) 1990-1999, (b) 2000-2009,  
 72 (c) 2010-2019, and also the full common time period (1980-2019). Bar plots on each  
 73 subplot show the number of  $1^\circ \times 1^\circ$  grid cells in this region which contain observations in  
 74 the two databases.

75  
 76

## 77 **Supplementary**

78

79 Here we discuss the method and results based on observations included in the  
80 LDEOv2019 database to create an updated climatology. Comparisons are also made to  
81 the climatology discussed in the main text which is based on the SOCATv2022  
82 database.

83

### 84 **S1. Methods**

85

#### 86 **S1.1 LDEO database**

87

88 The LDEOv2019 database (available at [https://www.ncei.noaa.gov/access/ocean-](https://www.ncei.noaa.gov/access/ocean-carbon-acidification-data-system/oceans/LDEO_Underway_Database/)  
89 [carbon-acidification-data-system/oceans/LDEO\\_Underway\\_Database/](https://www.ncei.noaa.gov/access/ocean-carbon-acidification-data-system/oceans/LDEO_Underway_Database/), Takahashi et al.  
90 (2020)) consists of over 14 million measurements of  $p\text{CO}_2^{\text{oce}}$  with the earliest  
91 observations dating back to 1957 and the most recent collected in 2019 (Supplementary  
92 Figure 1). This database includes only  $p\text{CO}_2^{\text{oce}}$  values measured directly using the air-  
93 water equilibration method and requires that two or more standard gas mixtures were  
94 used for analyzer calibrations. This strict criteria for observation quality is unique to the  
95 LDEO database.

96

97 In this analysis, we restrict the time period to include observations collected beginning in  
98 1980, which accounts for 99.9% of the available observations within the LDEOv2019  
99 database. Additionally, we eliminate observations in the database that are not  
100 accompanied by both an observed sea surface temperature (SST) and atmospheric sea  
101 level pressure (SLP). Not only does this act to flag observations that might not be of the  
102 highest quality, it also allows a consistent methodology for creating the climatology from  
103 both the LDEO and SOCAT databases since the ancillary observations of SST and SLP  
104 are necessary to convert from  $p\text{CO}_2$  to  $f\text{CO}_2$ , as well as to calculate a delta value, both  
105 steps which are essential in this updated climatology version.

106

107 Within the LDEO database, there are approximately 9400 observations without SST  
108 observations and nearly 755,000 missing SLP. Given instances where both SST and  
109 SLP are missing, the total number of omitted observations with this criteria is 764,115.  
110 Approximately 13.4 of the 14 million observations in the LDEO database meet all  
111 ancillary data requirements.

112

113 We have converted all  $p\text{CO}_2$  observations in the LDEO database to  $f\text{CO}_2$  values. As a  
114 pre-processing step, we have calculated  $f\text{CO}_2$  values at the reported SST which helps  
115 to ensure a uniform representation of the surface ocean observations. The protocol for  
116 this conversion step follows that of the SOCAT methodology (Pfeil et al. 2013) which  
117 utilizes the equations recommended by Dickson et al. (2007) and requires observed  
118 temperature, salinity, and pressure.

119

120 Given the dramatic increase in  $p\text{CO}_2^{\text{oce}}$  measurements available since previous  
121 releases of the climatology (LDEOv2006, T-2009, and LDEOv2012, T-2014, included  
122 nearly 3 and 6.5 million observations, respectively, covering years 1970 to 2007 and

123 1957 to 2012, respectively), we do not remove the observations collected in the  
124 equatorial Pacific during El Niño years since inclusion does not strongly influence the  
125 overall result as in previous versions where those data made up a larger percentage of  
126 available observations.

127  
128 There is a large overlap between the LDEO and SOCAT databases particularly for data  
129 prior to circa 2015. The LDEO and SOCAT databases are similar in that they restrict the  
130 included data to only observations that are measured in near-continuous operation or in  
131 discrete samples with an equilibrator system. Neither database includes  $p\text{CO}_2/f\text{CO}_2$   
132 measurements that are calculated from dissolved inorganic carbon, total alkalinity  
133 and/or pH.

## 134 135 **S1.2 Atmospheric $f\text{CO}_2$ calculation for LDEO database**

136  
137 For the LDEO database, the corresponding atmospheric  $\text{CO}_2$  value is not included in  
138 the reported database as it is in the SOCAT database, so atmospheric  $\text{CO}_2$  values from  
139 the NOAA MBL product (Lan et al. 2023) are matched based on month and location  
140 (latitude) of the  $p\text{CO}_2^{\text{oce}}$  observation. In calculating  $f\text{CO}_2$  from  $p\text{CO}_2$ , we use the  
141 reported SLP, SST and salinity from the LDEO database.

## 142 143 **S2. Results**

### 144 145 **S2.1 LDEO $\Delta f\text{CO}_2$ climatology**

#### 146 147 **S2.1.1 Global**

148  
149 Supplementary Figure 2 shows the near-global annual climatological mean distribution  
150 of  $\Delta f\text{CO}_2$  ( $f\text{CO}_2^{\text{oce}}$  minus  $f\text{CO}_2^{\text{air}}$ ) for both databases. Large-scale patterns across the  
151 global ocean include the consistent high (positive)  $\Delta f\text{CO}_2$  values in the equatorial Pacific  
152 where upwelling is a dominant influence, and low (negative) values of  $\Delta f\text{CO}_2$  in the  
153 North Atlantic physical processes including evaporation (increase salinity) and cooling  
154 drive strong uptake of carbon and subduction of surface waters.

155  
156 As for SOCAT, the near-global LDEO  $\Delta f\text{CO}_2$  climatology curve has a bimodal shape  
157 (Supplementary Figure 3) with a smaller peak in boreal spring (March/April) and a larger  
158 peak in late boreal summer (August/September). The LDEO curve reaches its minimum  
159 in January and begins a recovery throughout the boreal winter before dipping again for  
160 a springtime minimum in May. While the overall pattern is similar between the SOCAT  
161 and LDEO curves, the LDEO curve has a larger amplitude, reaching a higher peak and  
162 lower trough. The near-global LDEO annual mean  $\Delta f\text{CO}_2$  value is  $-3.9 \mu\text{atm}$ .

#### 163 164 **S2.1.2 Regional**

165  
166 The equatorial regions of the Pacific and Atlantic oceans have positive  $\Delta f\text{CO}_2$  values  
167 throughout the annual cycle and little seasonal variability (Supplementary Figure 3,  
168 4ab). This indicates that these areas are sources of  $\text{CO}_2$  to the atmosphere year round.

169 The equatorial Pacific has the highest positive  $\Delta f\text{CO}_2$  values (annual mean of 31.5  
170  $\mu\text{atm}$ ), followed by the tropical Atlantic (annual mean of 11.6  $\mu\text{atm}$ , Supplementary  
171 Figure 4).

172  
173 The subtropical biomes, representing the temperate North and South Atlantic and  
174 Pacific basins exhibit large seasonal  $\Delta f\text{CO}_2$  cycles which change sign throughout the  
175 year (Supplementary Figure 4); positive  $\Delta f\text{CO}_2$  occurs in warm summer months and  
176 negative values in colder winter months reflecting the dominance of seasonal  
177 temperature changes on the cycles of  $\Delta f\text{CO}_2$  in these regions. In the LDEO database,  
178 the seasonal amplitude for the subtropical North Pacific is 43.3  $\mu\text{atm}$ , and is slightly  
179 larger than the seasonal amplitude in the subtropical North Atlantic (39.6  $\mu\text{atm}$ ). The  
180 same pattern is observed in the SOCAT database however with slightly larger  
181 amplitudes for both basins (Figure 4, Supplementary Figure 4). Since the mean  
182 seasonal amplitudes for SST are quite similar in these two oceans, with the Atlantic  
183 having a slightly larger seasonal change in surface temperature (4.4°C in Pacific and  
184 5.0°C in Atlantic), the difference in  $\Delta f\text{CO}_2$  amplitudes between the Pacific and Atlantic  
185 subtropical regions cannot be attributed solely to SST, and may reflect differences in  
186 biogeochemical cycling between these two basins.

187  
188 Seasonal changes in the northern subtropical oceans are roughly six months out of  
189 phase from the southern subtropical biomes. The South Pacific subtropical biome has  
190 significantly smaller seasonal amplitude than the corresponding Northern Hemisphere  
191 region; the South Pacific subtropical biome amplitude is 15.3  $\mu\text{atm}$ . The amplitude in the  
192 South Atlantic subtropical basin is much more comparable to the North Atlantic (South  
193 Atlantic subtropical amplitude is 37.1  $\mu\text{atm}$ ). The Indian Ocean subtropical biome, which  
194 encompasses most of the Indian Ocean, both above and below the Equator, has a  
195 smaller amplitude (19.8  $\mu\text{atm}$ ) but the phasing matches well with the South Pacific and  
196 Atlantic biomes, with peak (positive)  $\Delta f\text{CO}_2$  values in February and the lowest values in  
197 August (Supplementary Figure 4). The low  $f\text{CO}_2$  in the Indian and South Pacific  
198 subtropical basin is partially attributable to lower SST variability in these regions (SST  
199 seasonal cycle amplitudes are 4.0°C in South Pacific and 3.0°C in the Indian as  
200 compared to 4.6°C in the South Atlantic) however it is likely that differences in  
201 spatiotemporal patterns of primary productivity also contribute to this difference. The  
202 striking difference in the amplitude of the cycle in the South Pacific and Indian  
203 subtropics could also be influenced by undersampling in these basins and in the  
204 Southern Hemisphere oceans overall.

205  
206 The timing of the peak drawdown in the subpolar regions is opposite that observed in  
207 the subtropical North Pacific and Atlantic basins. A strong negative  $\Delta f\text{CO}_2$  in the spring  
208 to summer months is due to the effects of biological drawdown which quickly and  
209 dramatically lowers the  $\text{CO}_2$  levels of the surface ocean. With its biological dependence  
210 and strongly stratified mixed layers, the subpolar region seasonal cycle are roughly four  
211 to six months out of phase with those from the adjacent subtropical regions. In the  
212 Atlantic subpolar biome,  $\Delta f\text{CO}_2$  values are consistently below zero throughout the  
213 annual cycle (maximum of -31.1  $\mu\text{atm}$  occurs in January). In the Pacific basin, the  
214 ocean exceeds the atmospheric levels of  $f\text{CO}_2$  in the boreal winter (Jan-March) before

215 the spring bloom results in biological drawdown which lowers the  $\Delta f\text{CO}_2$  values below  
216 zero for the remainder of the year. The spring drawdown is weaker in the Pacific basin  
217 than the Atlantic.

218  
219 Supplementary Figure 4c displays the seasonal cycle for the Southern Ocean biomes  
220 including the seasonal ice biome, the subpolar region, and the seasonally stratified  
221 subtropical region of the Southern Hemisphere. Unlike the subtropical regions of the  
222 other basins, this region has a relatively small seasonal  $\Delta f\text{CO}_2$  amplitude and has  
223 consistently negative  $\Delta f\text{CO}_2$  values (atmosphere>ocean) throughout the annual cycle.  
224 The mean of this Southern Ocean subtropical region is  $-20.9 \mu\text{atm}$  with a maximum  
225 amplitude of  $9.1 \mu\text{atm}$ .

226  
227 Unlike the seasonally-stratified subtropical region of the Southern Ocean, the Southern  
228 Ocean subpolar and ice biomes both have relatively strong seasonal cycles, reaching a  
229 maximum  $\Delta f\text{CO}_2$  of zero or slightly positive during the late austral winter and early  
230 austral spring (Supplementary Figure 4).

231

## 232 **S2.2 LDEO flux**

233

234 The mean annual air-sea  $\text{CO}_2$  flux for the LDEO database is  $-1.68 \text{ PgC yr}^{-1}$  with  
235 negative indicating an uptake by the ocean. This represents a slightly greater flux into  
236 the ocean than the direct estimate from the previous version of the climatology  
237 (Takahashi et al. 2009) which estimated global mean flux at  $1.4 \text{ PgC yr}^{-1}$ . For the  
238 uncertainty in global ocean-atmosphere  $\text{CO}_2$  flux reported here we use the value  
239 reported by Wanninkhof et al. (2013) as described above.

240

241 The global mean flux estimate presented here is for the area of the global ocean  
242 covered by this database and does not fully extend over the entire global ocean; it  
243 covers 90% of the global ocean. Specifically, coastal and high latitude regions are  
244 missing also as described above for the SOCAT database.

245

246 Supplementary Figure 7 shows the climatological seasonal mean sea-air  $\text{CO}_2$  flux ( $\text{mol}$   
247  $\text{m}^{-2} \text{ yr}^{-1}$ ) for two seasons (DJF and JJA). The equatorial Pacific is the most prominent  
248 atmospheric  $\text{CO}_2$  source region, with a seasonally persistent sea-to-air flux. When  
249 combined with the equatorial Atlantic region, the tropical belt emits an annual mean  
250  $0.35 \text{ PgC yr}^{-1}$  to the atmosphere.

251

252 Adjacent to this tropical efflux zone lies an area of seasonally variable uptake patterns.  
253 The subtropical basins in both hemispheres act as  $\text{CO}_2$  sinks in the cooler months and  
254 transition to regions of neutral or small  $\text{CO}_2$  sources during the warmer months. At  
255 higher subtropical latitudes, strong winds and relatively low ocean  $f\text{CO}_2$  occur along the  
256 subtropical convergence zone- a region where the cooled subtropical gyre waters with  
257 low  $f\text{CO}_2$  meet the subpolar waters with biologically-lowered  $f\text{CO}_2$ .

258

259 The Northern Hemisphere subtropical region represents a smaller sink ( $-0.64 \text{ PgC yr}^{-1}$ )  
260 than the corresponding Southern Hemisphere region ( $-0.82 \text{ PgC yr}^{-1}$ ), largely due to the

261 overall greater size of the oceans in the Southern Hemisphere at these latitudes as  
262 noted above. There is also significant uptake in the Southern Ocean subtropical region  
263 (-0.55 PgC yr<sup>-1</sup>).

264

## 265 **S2.3 Comparison of climatologies built from SOCAT and LDEO databases**

266

### 267 **S2.3.1 Global**

268

269 On a global scale, the monthly mean  $\Delta f\text{CO}_2$  seasonal amplitudes for the climatology  
270 produced using the LDEO database is larger than for the SOCAT database, reaching  
271 both higher in the boreal summer and lower in the boreal winter months. The LDEO  
272 climatology has an amplitude of 6.6  $\mu\text{atm}$  while the SOCAT global mean climatology  
273 amplitude is 5.0  $\mu\text{atm}$  (Supplementary Figure 2).

274

275 The mean annual air-sea CO<sub>2</sub> flux resulting from the LDEO version of the climatology  
276 created is -1.67 PgC yr<sup>-1</sup>, with negative value indicating an uptake by the ocean. This  
277 represents a slightly greater flux into the ocean than the direct estimate from the  
278 previous version of the climatology (T-2009) which estimated global mean flux of -1.4  
279 PgC yr<sup>-1</sup>. This shift towards greater carbon uptake is consistent with other work  
280 indicating increased ocean uptake in recent decades (Friedlingstein et al. 2022, DeVries  
281 et al. 2023).

282

283 The LDEO climatology annual mean flux is slightly less negative than the mean global  
284 air-sea CO<sub>2</sub> flux based on the SOCAT database (-1.79 PgC yr<sup>-1</sup>). While the overall  
285 shape of the seasonal cycle is comparable between the two databases, the amplitude in  
286 flux is much larger for the LDEO database, a result of the larger  $\Delta f\text{CO}_2$  global mean  
287 amplitude (Supplementary Figure 2). Specifically, the LDEO database has global mean  
288 flux values approaching zero during the boreal summer months, leading to a reduced  
289 uptake of carbon during these months. While the boreal winter months have similar flux  
290 estimates between the two databases, the difference during the months of July, August,  
291 and September ultimately reduce the overall global mean flux value reported from the  
292 LDEO database.

293

### 294 **S.2.3.2 Southern Ocean**

295

296 While the total annual Southern Ocean (<35S) flux estimates are similar (-1.04 PgC yr<sup>-1</sup>  
297 and -0.90 PgC yr<sup>-1</sup> for SOCAT and LDEO respectively), discrete regions of the Southern  
298 Ocean exhibit some of the largest differences in the climatological air-sea flux created  
299 from the SOCAT versus LDEO database (Figure 5, Supplementary Figure 6).

300 Specifically, in the ocean region south of Australia, the SOCAT database produces flux  
301 estimates of larger carbon uptake/less efflux than the LDEO database. This signal of  
302 larger uptake estimates in the SOCAT database is consistent throughout all months of  
303 the year but peaks during August, September, and October. These differences are likely  
304 a result of more available observations in the SOCAT database in this region (Figure 1,  
305 Supplementary Figure 1). Throughout the vast expanse of the remainder of the  
306 Southern Hemisphere subtropical and subpolar regions (i.e. the Pacific and Atlantic



307 sectors), the differences are much smaller and heterogeneous (Figure 5,  
308 Supplementary Figure 6). Therefore, we do not see substantial biome-scale differences  
309 in the climatology of either  $\Delta f\text{CO}_2$  or carbon flux despite the small anomalous region  
310 south of Australia.

311

### 312 **S2.3.3 North Atlantic Subpolar Differences**

313

314 For most regions of the global ocean, the  $\Delta f\text{CO}_2$  climatological cycle is consistent  
315 between the SOCAT and LDEO datasets (Figure 4, Supplementary Figure 4).  
316 Differences in the absolute magnitude of the  $\Delta f\text{CO}_2$  values are also observed in the  
317 equatorial regions in both the Atlantic and Pacific basins where SOCAT has slightly  
318 larger  $\Delta f\text{CO}_2$  values, but the overall shape and amplitude of the seasonal cycle is  
319 consistent between the two databases. One exception to this is the North Atlantic  
320 subpolar region where the differences in seasonal climatology between the two datasets  
321 are large. The North Atlantic subpolar region has similar total annual  $\Delta f\text{CO}_2$  estimates (-  
322 37.45  $\mu\text{atm}$  and -42.33  $\mu\text{atm}$  for SOCAT and LDEO respectively) but the seasonal  
323 differences are profound (Supplementary Figure 9).

324

325 The seasonal amplitude in the North Atlantic subpolar biome is over two times as large  
326 for the SOCAT database compared to the LDEO database (28.3  $\mu\text{atm}$  in LDEO and  
327 56.9  $\mu\text{atm}$  in SOCAT; Figure 4 and Supplementary Figure 4). While the phasing and  
328 shape of the seasonal cycle is consistent between the two databases in this region,  
329 there is a significant difference in the amplitude of the winter to summer transition. While  
330 the winter (DJF) mean  $\Delta f\text{CO}_2$  is about 10  $\mu\text{atm}$  different between the two (LDEO being  
331 more negative than SOCAT), the opposite is true for the summer season with the  
332 SOCAT showing more positive values. The transition to spring and summer blooms,  
333 when  $\Delta f\text{CO}_2$  is greatly reduced allowing for more uptake by the surface ocean, is very  
334 different between the two databases with a March to June change of 54.7  $\mu\text{atm}$  in the  
335 SOCAT database versus 23.1  $\mu\text{atm}$  for LDEO. Spring/Summer (MAM/JJA)  $\Delta f\text{CO}_2$   
336 values for the LDEO database are -46.7 and -51.6  $\mu\text{atm}$ , respectively, while for the  
337 SOCAT database corresponding values are -37.4 and -57.9  $\mu\text{atm}$ , respectively (Figure  
338 4, Supplementary Figures 4 and 9). While an annual mean value in this region may not  
339 show a significant difference between the two databases, the differences in seasonal  
340 cycle amplitude are likely driven by mechanisms that are more completely captured by  
341 the higher sampling density of the SOCAT database and missed in LDEO.

342

343 The amplitude of the seasonal cycle increases with time from the 1990s to the 2000s in  
344 both databases, however it is the 2010-2019 time period that shows the strongest  
345 differences between the climatology produced by each database (Supplementary Figure  
346 9). For the most recent decade (2010-2019), the amplitude of  $\Delta f\text{CO}_2$  calculated from the  
347 LDEO database actually decreases from the previous decade (14.6  $\mu\text{atm}$ ) while the  
348 amplitude from the SOCAT database is larger than any previous decade, exceeding 50  
349  $\mu\text{atm}$  in absolute amplitude (SOCAT amplitude is 54.8  $\mu\text{atm}$ ; Supplementary Figure 9c).  
350 The LDEO database is likely lacking sufficient seasonal observations to fully capture the  
351 biological drawdown that characterizes this region.

352

353 Specifically, this stark contrast is likely due to the abundance of observations in the  
354 higher latitudes of the North Atlantic subpolar region in the SOCAT database around  
355 Iceland and extending into the Norwegian Sea (Figure 1, Supplementary Figure 1). This  
356 result is due both to differences in spatial and temporal coverage. Many grid cells in the  
357 version created from the SOCAT database include full seasonal coverage (twelve  
358 unique months of observations over the full time period considered). This subpolar  
359 North Atlantic is a very dynamic region particularly over the spring/summer months with  
360 strong biological drawdown of CO<sub>2</sub> in strongly stratified shallow mixed layers. In order to  
361 accurately capture the seasonal evolution of  $\Delta f\text{CO}_2$ , it is imperative to have  
362 observations from each season. To capture the evolution of the seasonal cycle in this  
363 region over long time intervals requires near continuous full seasonal coverage of  
364 observations highlighting the importance of expanded efforts to observe the high  
365 latitude oceans.

366

367

#### 368 Supplementary References

369

370 Takahashi, Taro; Sutherland, Stewart C.; Kozyr, Alex (2020). Global Ocean Surface  
371 Water Partial Pressure of CO<sub>2</sub> Database: Measurements Performed During 1957-2019  
372 (LDEO Database Version 2019) (NCEI Accession 0160492). Version 9.9. NOAA  
373 National Centers for Environmental Information. Dataset.  
374 [https://doi.org/10.3334/CDIAC/OTG.NDP088\(V2015\)](https://doi.org/10.3334/CDIAC/OTG.NDP088(V2015))

375
